# Supplementary material for: Aspirin use is associated with the reduced mortality risk in chronic obstructive pulmonary disease with sepsis: a retrospective study using the MIMIC-IV database
Source: PubMed Central journal article supplement — J Thorac Dis. 2024 Oct 15;16(10):6688–98. doi: 10.21037/jtd-24-952 (PMC11565322; doi:10.21037/jtd-24-952), 2024-10-15
Supplement: jtd-16-10-6688-supplementary.pdf [file jtd-16-10-6688-supplementary.pdf]

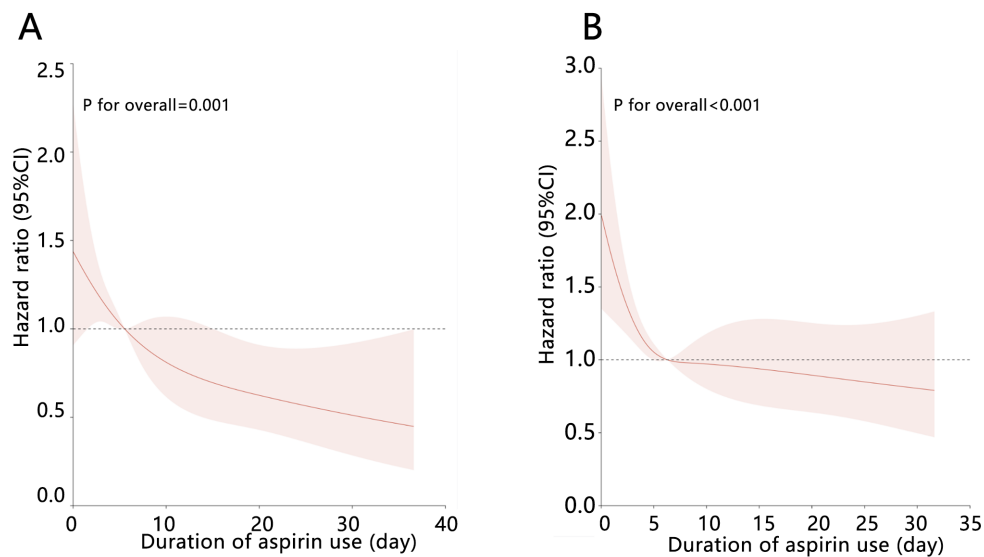

**Figure S1** The RCS analysis between the duration of aspirin use and mortality. (A) In-hospital death; (B) 28-day mortality. CI, confidence interval; RCS, restricted cubic spline.

**Table S1** Association of aspirin use with in-hospital death using multivariable logistic regression analysis

| Variables              | Estimate | SE    | Z      | P      | OR (95% CI)          |
|------------------------|----------|-------|--------|--------|----------------------|
| Age                    | 0.037    | 0.005 | 6.895  | <0.001 | 1.037 (1.027, 1.048) |
| Heart rate             | 0.007    | 0.004 | 1.830  | 0.07   | 1.007 (1.000, 1.014) |
| DBP                    | -0.005   | 0.006 | -0.803 | 0.42   | 0.995 (0.983, 1.007) |
| SpO <sub>2</sub>       | -0.039   | 0.006 | -6.094 | <0.001 | 0.962 (0.949, 0.974) |
| Glucose                | 0.003    | 0.001 | 2.580  | 0.01   | 1.003 (1.001, 1.006) |
| Hematocrit             | -0.006   | 0.010 | -0.632 | 0.53   | 0.994 (0.974, 1.013) |
| Pt                     | 0.042    | 0.008 | 5.039  | <0.001 | 1.043 (1.026, 1.060) |
| Aspirin use            | -0.595   | 0.120 | -4.952 | <0.001 | 0.552 (0.435, 0.697) |
| Gender (female)        | 0.109    | 0.109 | 1.001  | 0.32   | 1.115 (0.901, 1.381) |
| Renal disease          | 0.221    | 0.134 | 1.649  | 0.10   | 1.247 (0.957, 1.619) |
| CAD                    | -0.174   | 0.136 | -1.284 | 0.20   | 0.840 (0.643, 1.095) |
| Diabetes               | -0.230   | 0.122 | -1.880 | 0.06   | 0.795 (0.625, 1.008) |
| Hypertension           | -0.225   | 0.119 | -1.889 | 0.06   | 0.799 (0.632, 1.008) |
| Mechanical ventilation | 0.561    | 0.123 | 4.561  | <0.001 | 1.752 (1.375, 2.227) |
| CRRT                   | 1.035    | 0.168 | 6.149  | <0.001 | 2.815 (2.024, 3.917) |
| Vasopressor use        | 1.242    | 0.119 | 10.442 | <0.001 | 3.462 (2.747, 4.379) |

SE, standard error; OR, odds ratio; CI, confidence interval; DBP, diastolic blood pressure; SpO<sub>2</sub>, oxygen saturation; Pt, prothrombin time; CAD, coronary artery disease; CRRT, continuous renal replacement therapy.

**Table S2** Association of aspirin use with 28-day mortality using multivariable logistic regression analysis

| Variables               | Estimate | SE    | Z      | P      | OR (95% CI)          |
|-------------------------|----------|-------|--------|--------|----------------------|
| Age                     | 0.042    | 0.005 | 8.609  | <0.001 | 1.043 (1.033, 1.053) |
| Heart rate              | 0.009    | 0.003 | 2.776  | 0.005  | 1.009 (1.003, 1.016) |
| DBP                     | -0.006   | 0.006 | -1.057 | 0.29   | 0.994 (0.983, 1.005) |
| SpO <sub>2</sub>        | -0.033   | 0.006 | -5.339 | <0.001 | 0.968 (0.956, 0.979) |
| Glucose                 | 0.004    | 0.001 | 2.966  | 0.003  | 1.004 (1.001, 1.006) |
| Hematocrit              | -0.009   | 0.009 | -1.043 | 0.30   | 0.991 (0.973, 1.008) |
| Pt                      | 0.047    | 0.008 | 5.606  | <0.001 | 1.048 (1.031, 1.065) |
| Aspirin use             | -0.647   | 0.109 | -5.917 | <0.001 | 0.524 (0.422, 0.648) |
| Gender (female)         | 0.090    | 0.099 | 0.910  | 0.36   | 1.095 (0.901, 1.330) |
| Renal disease           | 0.260    | 0.123 | 2.109  | 0.04   | 1.296 (1.017, 1.648) |
| Coronary artery disease | -0.218   | 0.123 | -1.763 | 0.08   | 0.804 (0.631, 1.024) |
| Diabetes                | -0.252   | 0.111 | -2.258 | 0.02   | 0.778 (0.624, 0.966) |
| Hypertension            | -0.332   | 0.109 | -3.060 | 0.002  | 0.717 (0.579, 0.887) |
| Mechanical ventilation  | 0.440    | 0.116 | 3.795  | <0.001 | 1.553 (1.236, 1.947) |
| CRRT                    | 0.995    | 0.166 | 5.987  | <0.001 | 2.704 (1.954, 3.749) |
| Vasopressor use         | 0.966    | 0.106 | 9.106  | <0.001 | 2.628 (2.136, 3.238) |

SE, standard error; OR, odds ratio; CI, confidence interval; DBP, diastolic blood pressure; SpO<sub>2</sub>, oxygen saturation; Pt, prothrombin time; CRRT, continuous renal replacement therapy.

**Table S3** Association of aspirin use with in-hospital death using multivariable Cox-regression analysis

| Variables               | Estimate | SE    | Z      | P      | HR (95% CI)          |
|-------------------------|----------|-------|--------|--------|----------------------|
| Aspirin use             | -0.393   | 0.098 | -4.002 | <0.001 | 0.675 (0.557, 0.818) |
| Gender (female)         | -0.139   | 0.089 | -1.570 | 0.12   | 0.870 (0.731, 1.035) |
| Renal disease           | -0.071   | 0.109 | -0.651 | 0.52   | 0.931 (0.752, 1.153) |
| Coronary artery disease | -0.055   | 0.113 | -0.482 | 0.63   | 0.947 (0.758, 1.183) |
| Diabetes                | -0.246   | 0.104 | -2.379 | 0.02   | 0.782 (0.638, 0.958) |
| Hypertension            | 0.212    | 0.100 | 2.113  | 0.04   | 1.236 (1.015, 1.505) |
| Mechanical ventilation  | -0.084   | 0.097 | -0.866 | 0.39   | 0.919 (0.760, 1.112) |
| CRRT                    | 0.441    | 0.121 | 3.648  | <0.001 | 1.554 (1.226, 1.970) |
| Age                     | 0.003    | 0.005 | 0.763  | 0.45   | 1.003 (0.995, 1.013) |
| Heart rate              | 0.002    | 0.003 | 0.579  | 0.56   | 1.002 (0.996, 1.007) |
| DBP                     | -0.001   | 0.004 | -0.209 | 0.83   | 0.999 (0.990, 1.008) |
| SpO <sub>2</sub>        | -0.010   | 0.004 | -2.287 | 0.02   | 0.990 (0.982, 0.999) |
| Glucose                 | 0.002    | 0.001 | 1.622  | 0.11   | 1.002 (1.000, 1.004) |
| Hematocrit              | 0.084    | 0.009 | 9.779  | <0.001 | 1.087 (1.069, 1.106) |
| Pt                      | 0.006    | 0.004 | 1.472  | 0.14   | 1.006 (0.998, 1.014) |
| Vasopressor use         | 0.696    | 0.100 | 6.972  | <0.001 | 2.006 (1.649, 2.440) |

SE, standard error; HR, hazard ratio; CI, confidence interval; CRRT, continuous renal replacement therapy; DBP, diastolic blood pressure; SpO<sub>2</sub>, oxygen saturation; Pt, prothrombin time.

**Table S4** Association of aspirin use with 28-day mortality using multivariable Cox-regression analysis

| Variables               | Estimate | SE    | Z      | P      | HR (95% CI)          |
|-------------------------|----------|-------|--------|--------|----------------------|
| Aspirin use             | -0.207   | 0.088 | -2.356 | <0.001 | 0.813 (0.684, 0.966) |
| Gender (female)         | -0.057   | 0.078 | -0.731 | 0.47   | 0.944 (0.810, 1.101) |
| Renal disease           | -0.059   | 0.096 | -0.617 | 0.54   | 0.943 (0.782, 1.137) |
| Coronary artery disease | -0.124   | 0.101 | -1.225 | 0.22   | 0.884 (0.725, 1.077) |
| Diabetes                | -0.170   | 0.090 | -1.882 | 0.06   | 0.844 (0.707, 1.007) |
| Hypertension            | 0.083    | 0.089 | 0.935  | 0.35   | 1.087 (0.913, 1.294) |
| Mechanical ventilation  | 0.150    | 0.087 | 1.731  | 0.08   | 1.162 (0.980, 1.378) |
| CRRT                    | 0.379    | 0.112 | 3.395  | 0.001  | 1.461 (1.174, 1.818) |
| Age                     | 0.005    | 0.004 | 1.207  | 0.23   | 1.005 (0.997, 1.013) |
| Heart rate              | 0.004    | 0.002 | 1.585  | 0.11   | 1.004 (0.999, 1.009) |
| DBP                     | 0.004    | 0.004 | 0.909  | 0.36   | 1.004 (0.996, 1.011) |
| SpO <sub>2</sub>        | -0.009   | 0.004 | -2.107 | 0.04   | 0.991 (0.983, 0.999) |
| Glucose                 | 0.001    | 0.001 | 1.098  | 0.27   | 1.001 (0.999, 1.003) |
| Hematocrit              | 0.013    | 0.007 | 1.772  | 0.08   | 1.013 (0.999, 1.027) |
| Pt                      | 0.004    | 0.004 | 1.135  | 0.26   | 1.004 (0.997, 1.012) |
| Vasopressor use         | 0.508    | 0.085 | 5.977  | <0.001 | 1.662 (1.407, 1.963) |

SE, standard error; HR, hazard ratio; CI, confidence interval; CRRT, continuous renal replacement therapy; DBP, diastolic blood pressure; SpO<sub>2</sub>, oxygen saturation; Pt, prothrombin time.
